# Supplementary material
Source: Springer Nature journal article supplement (https://www.springermedizin.de/resource/supplementary/12889_2004_132_MOESM3_ESM.pdf/9500384)

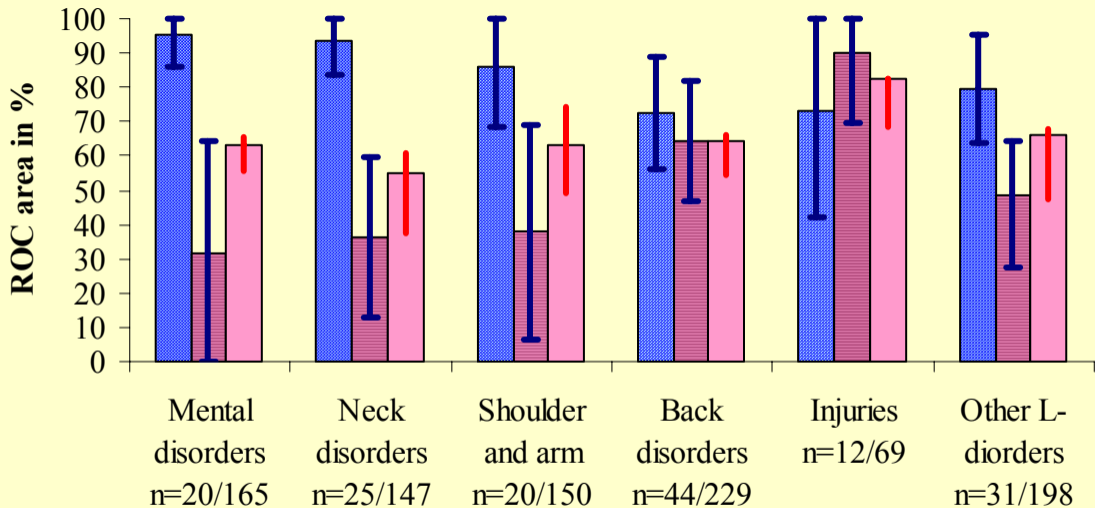

■ Sick-listed   
 ■ NIO assessors of responders   
 ■ NIO assessors of all sick leaves

Supplement: MOESM3 [file 9500384]
